# Supplementary material
Source: PubMed Central journal article supplement (PMC2921173)
Supplement: NIHMS218450-supplement-S1.pdf [file NIHMS218450-supplement-S1.pdf]

## Supplemental Information

### ***S. cerevisiae* Cell Culture and Protein Expression**

Two to three single colonies of yeast containing GST-tagged isoforms of the protein of interest were inoculated into 15 ml of minimal medium (-ura, +2% raffinose), shaking at 300 rpm and 30°C until OD<sub>600</sub> was about 2.5-3.0.

Culture was diluted with minimal medium (-ura, +2% raffinose) to OD<sub>600</sub>=0.02, shaking at 30°C (300 rpm) for about 24 hours until OD<sub>600</sub>=1.0.

One hundred ml of 40% galactose (final concentration is 4%) was added to induce protein expression, shaking at 300 rpm and 30°C O/N.

Cells were pelleted at 3000 x g for 10 min and washed with 200 ml of cold PBS. Cells were resuspended in 10 ml of glass bead disruption buffer (7 M urea, 2 M thio-urea, 4% CHAPS, 50 mM Tris-Cl, pH 8.0, 10 mM DTT and protease inhibitors). The suspension was divided into two 50 ml tubes and 2 volumes of pre-cooled glass beads were added. Vigorously vortexed for 20 cycles (1 min vortex/1 min on ice). Decanted and saved the supernatant. Added 2 ml of glass bead disruption buffer to wash the glass beads and pooled with previous supernatant.

Pooled supernatants were centrifuged at 12,000 rpm for 10 min at 4 °C. Supernatants were transferred to fresh tubes and centrifuged at 100,000 x g for 20 min at 4°C.

Supernatants were transferred to dialysis membranes and dialyzed against dialysis buffer (20 mM Tris-Cl pH 7.3, 20% glycerol, 200 μM EDTA, 100 mM KCl, 1 mM DTT, 1 mM PMSF) at 4°C O/N.

Dialyzed sample was centrifuged at 100,000 x g and 4°C for 20 minutes.

### **Purification of GST-tagged Yeast Proteins**

GST-beads were washed twice in 10 volumes PBS, sedimenting the GST-beads by centrifugation at 500 xg for 0.5 min. PBS was added to the beads to make a 50% slurry. Five hundred μl of the GST-bead slurry was added to the dialyzed crude protein extract and incubated with gentle agitation at 4 °C for 1 hour. GST-beads were sedimented by centrifugation at 500 xg for 0.5 min and the supernatant decanted. Beads were washed 3 times with 10 ml of RIPA buffer and once with PBS. Bound protein was eluted twice with 200 μl elution buffer (50 mM Tris-Cl pH 8.0, 10 mM reduced glutathione, 1 mM DTT, 100 mM KCl), incubating at room temperature for 10 min with gentle agitation.

## Supplemental Figure S1:

Spectra comparisons of *in vivo* peptides with their corresponding synthetic peptides or *in vivo* unmodified peptides.

(A) (i) MS/MS spectrum of peptide “VQALEEANND<sub>Me</sub>LENK” identified *in vivo* from HeLa samples, (ii) MS/MS spectrum of the synthetic peptide with the same sequence and modification site, (iii) MS/MS spectrum of unmodified peptide “VQALEEANNDLENK” identified *in vivo*.

(B) (i) MS/MS spectrum of peptide “ISM<sub>Ox</sub>PDVD<sub>Me</sub>LHLK” identified *in vivo* from HeLa samples, (ii) MS/MS spectrum of the synthetic peptide with the same sequence and modification site, (iii) MS/MS spectrum of unmodified peptide “ISM<sub>Ox</sub>PDVDLHLK” identified *in vivo*.

(C) (i) MS/MS spectrum of peptide “LLLIGD<sub>Me</sub>SGVGK” identified *in vivo* from HeLa samples, (ii) MS/MS spectrum of the synthetic peptide with the same sequence and modification site, (iii) MS/MS spectrum of unmodified peptide “LLLIGDSGVGK” identified *in vivo*.

(D) (i) MS/MS spectrum of peptide “VINDAFGIE<sub>Me</sub>E<sub>Me</sub>GLMTTVHSLTATQK” identified *in vivo* from *S. cerevisiae* samples, (ii) MS/MS spectrum of the synthetic peptide with the same sequence and modification site.

(E) (i) MS/MS spectrum of peptide “TTTGHLIYK<sub>Me</sub>” identified *in vivo*.

(F) (i) MS/MS spectrum of a putative D-methylated peptide “VDID<sub>Me</sub>APDVSIEGPDAK” identified *in vivo* from HeLa samples, (ii) MS/MS spectrum of the synthetic peptide with the same sequence and modification site.

(G) (i) MS/MS spectrum of a putative D-methylated peptide “ETENDD<sub>Me</sub>VTNVIQK” identified *in vivo* from HeLa samples, (ii) MS/MS spectrum of the synthetic peptide with the same sequence and modification site.

(H) (i) MS/MS spectrum of a putative D-methylated peptide “AADD<sub>Me</sub>TWEPFASGK” identified *in vivo* from HeLa samples, (ii) MS/MS spectrum of the synthetic peptide with the same sequence and modification site.

(I) (i) MS/MS spectrum of a putative D-methylated peptide “VLGTAYD<sub>Me</sub>K” identified *in vivo* from *S. cerevisiae* samples, (ii) MS/MS spectrum of the synthetic peptide with the same sequence and modification site.

(J) (i) MS/MS spectrum of a putative D-methylated peptide “LIQD<sub>Me</sub>ESTK” identified *in vivo* from *S. cerevisiae* samples, (ii) MS/MS spectrum of the synthetic peptide with the same sequence and modification site.

## **Supplemental Table T1**

A list of the number of identified proteins, peptides and unique peptides for each HeLa and Yeast sample in this study

# Supplemental Figure S1 (A)

(i)

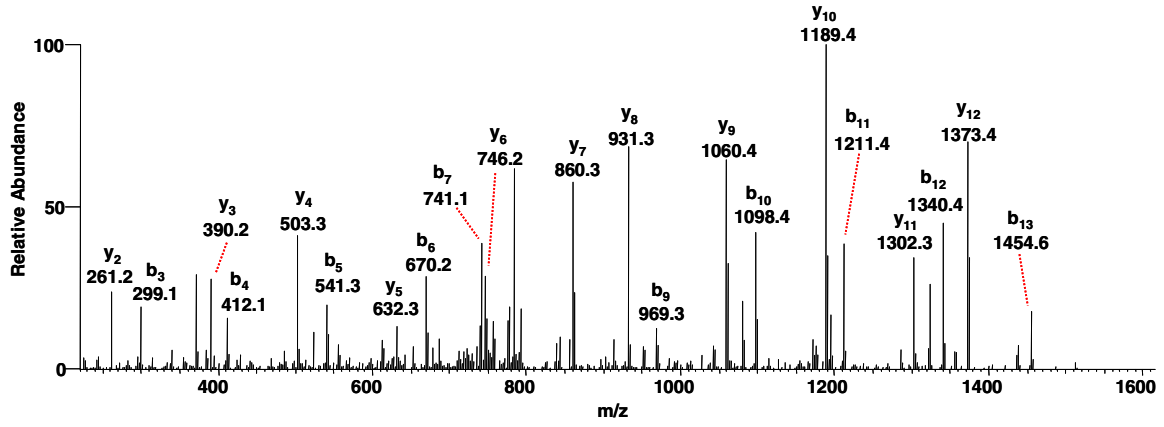

(ii)

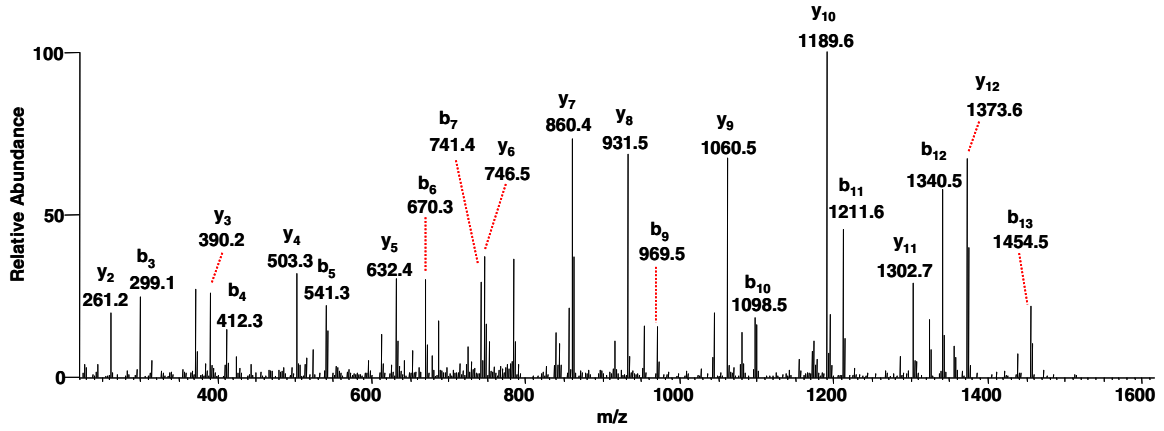

(iii)

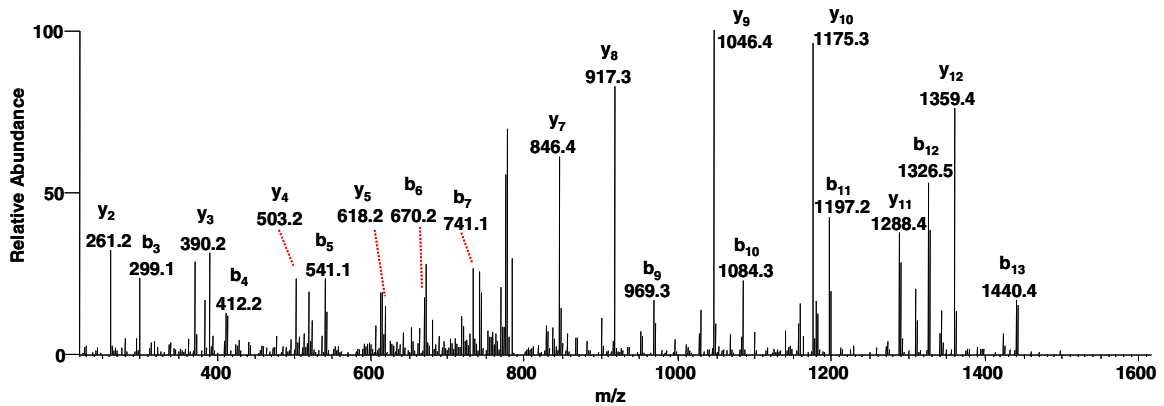

# Supplemental Figure S1 (B)

(i)

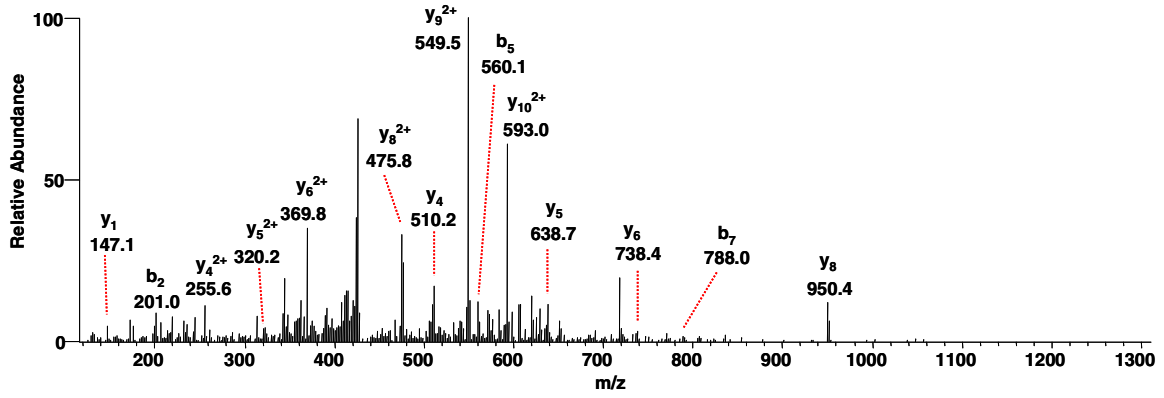

(ii)

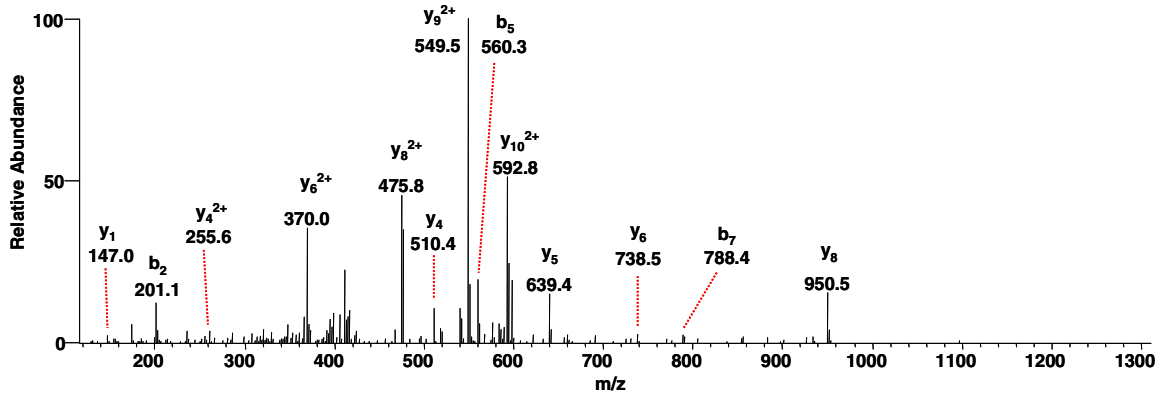

(iii)

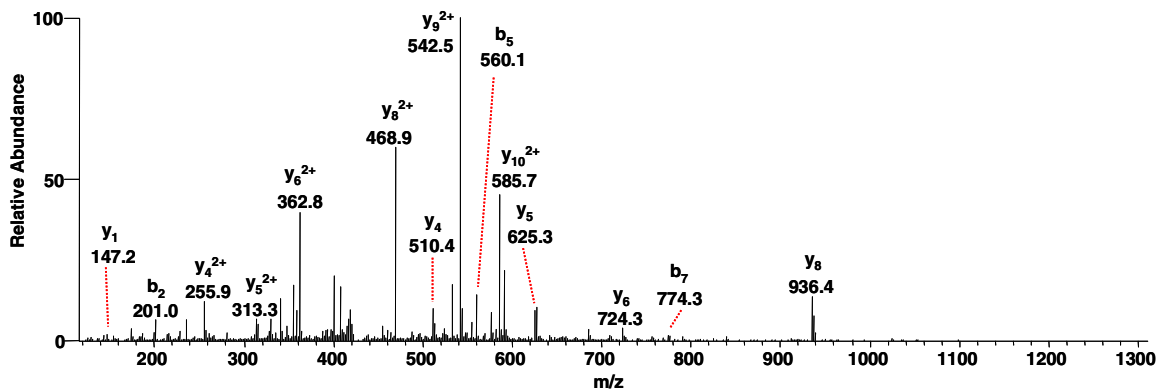

# Supplemental Figure S1 (C)

(i)

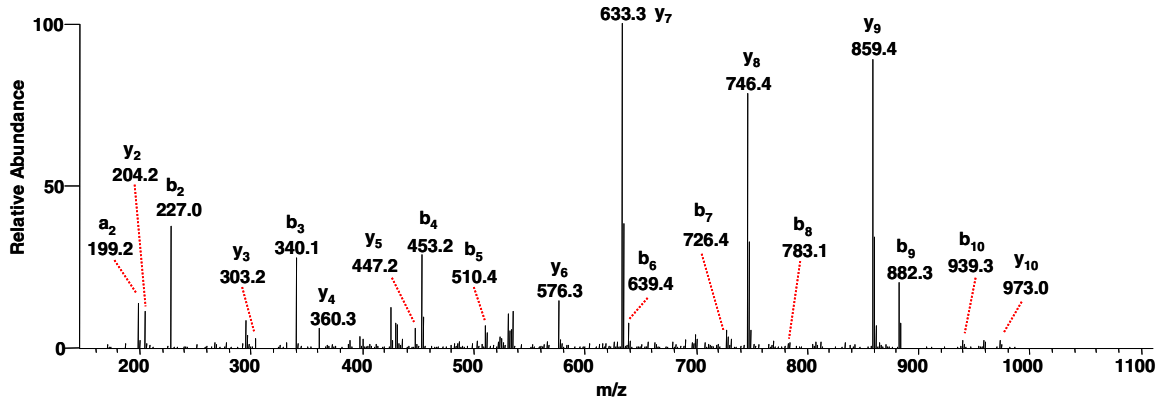

(ii)

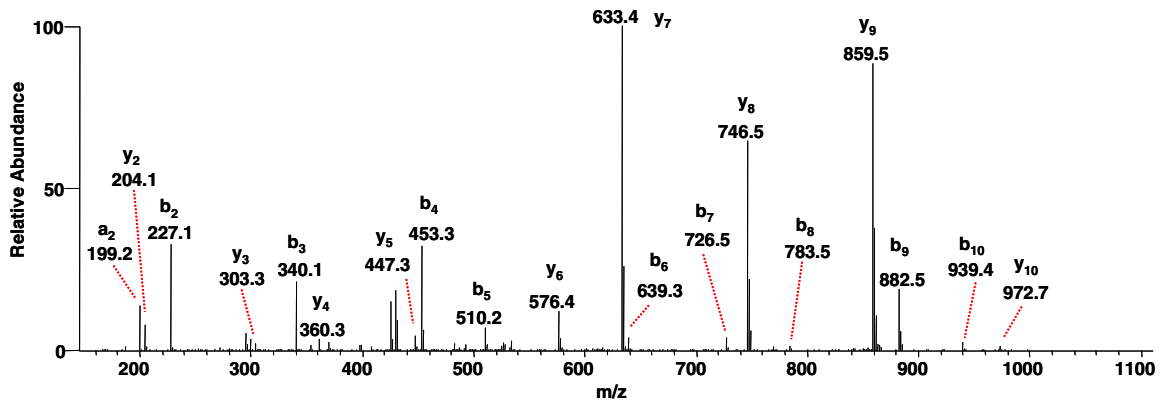

(iii)

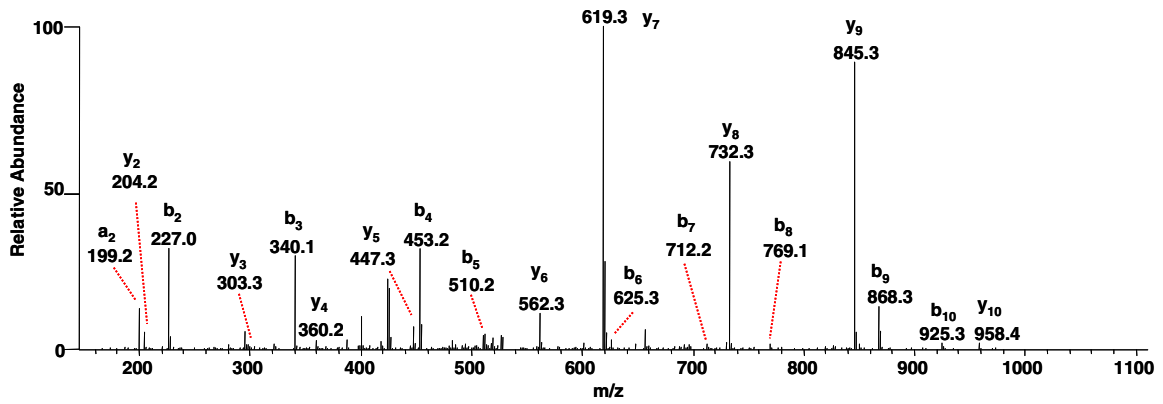

# Supplemental Figure S1 (D)

(i)

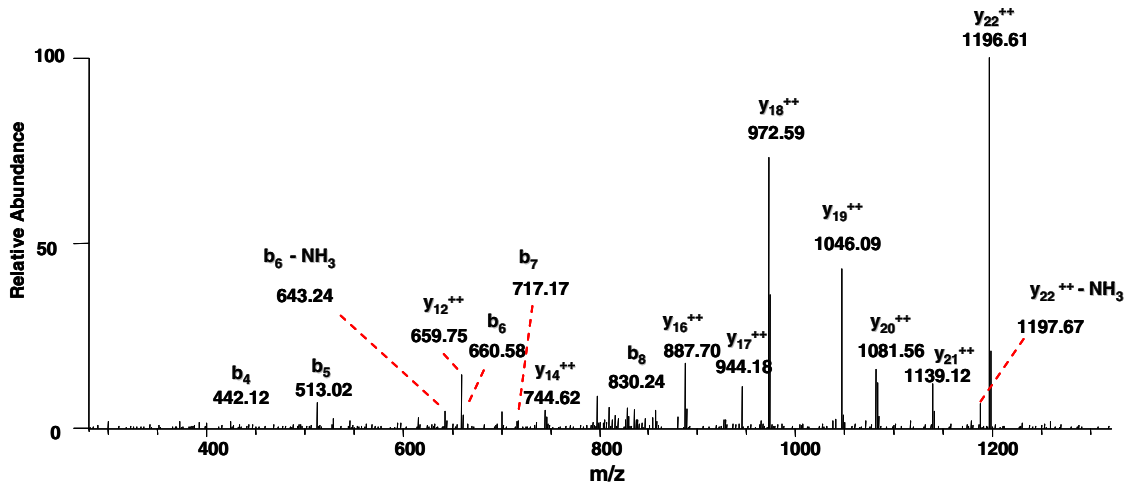

(ii)

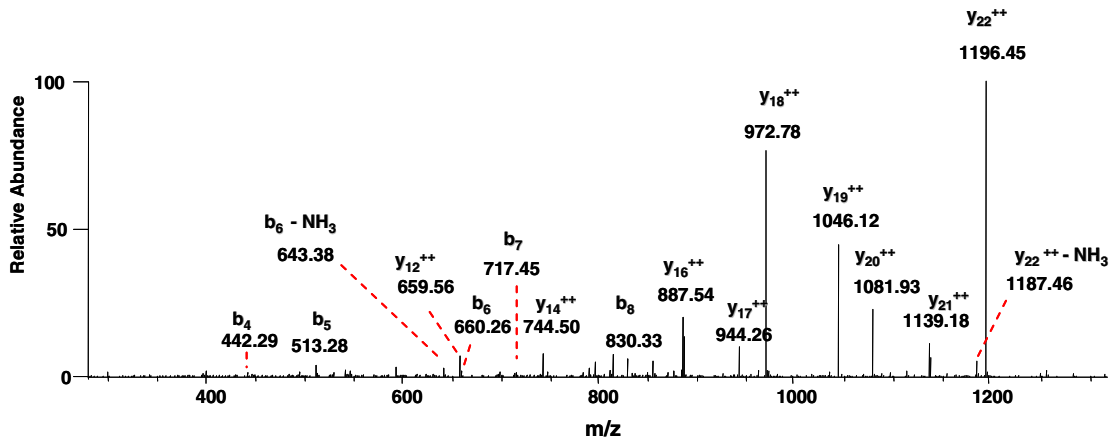

# Supplemental Figure S1 (E)

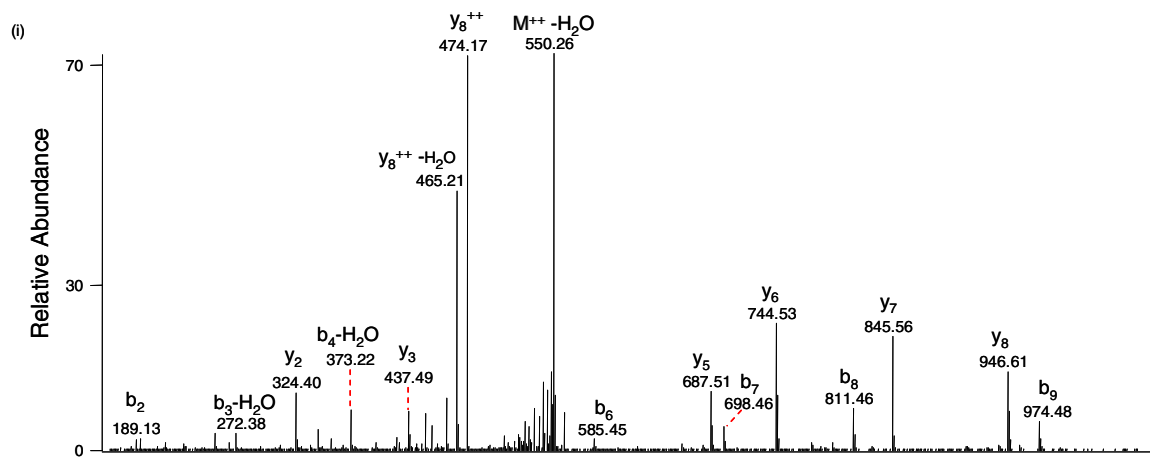



# Supplemental Figure S1 (F)

(i)

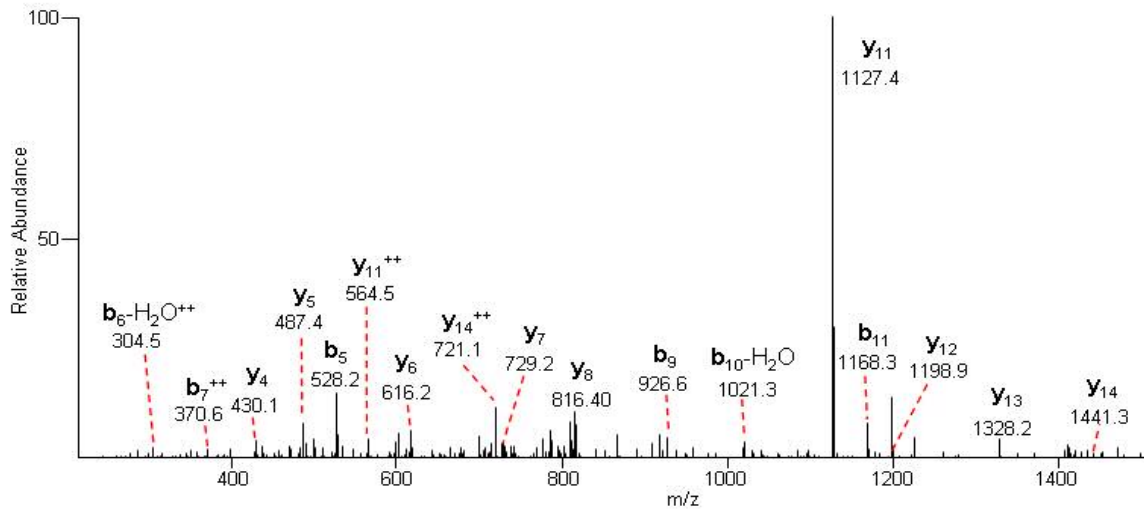

(ii)

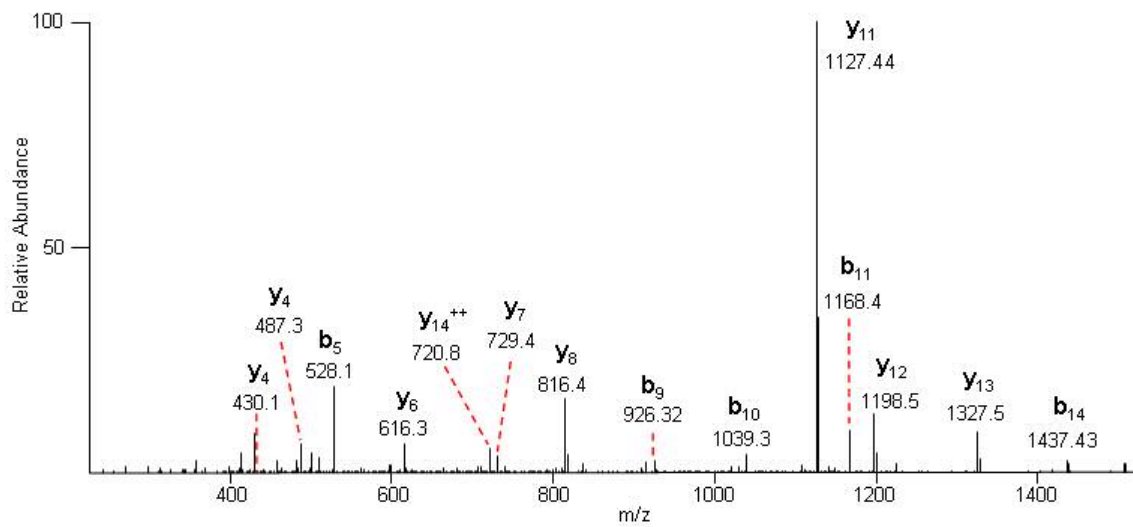

## Supplemental Figure S1 (G)

(i)

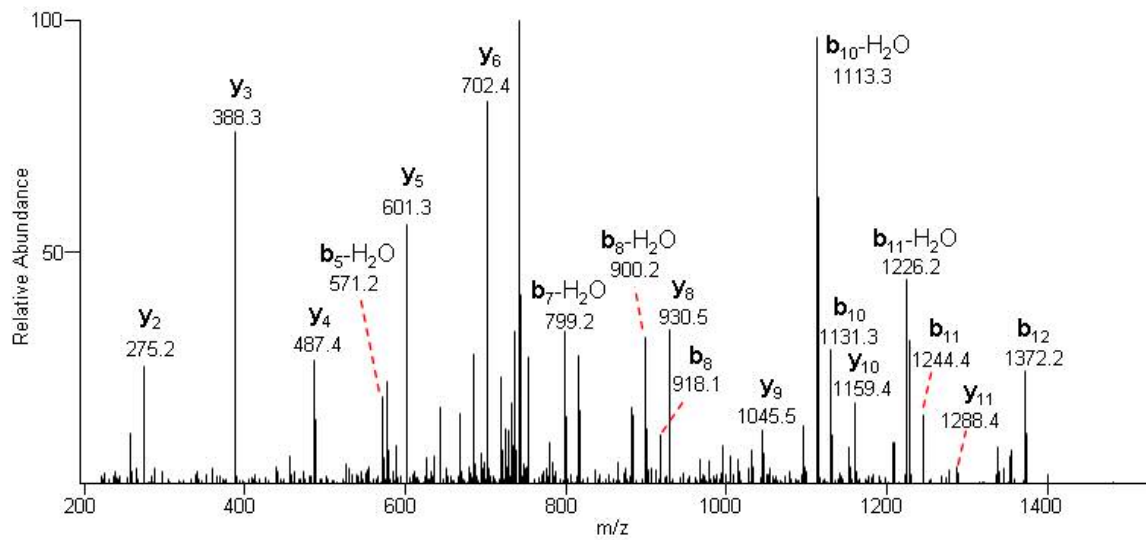

(ii)

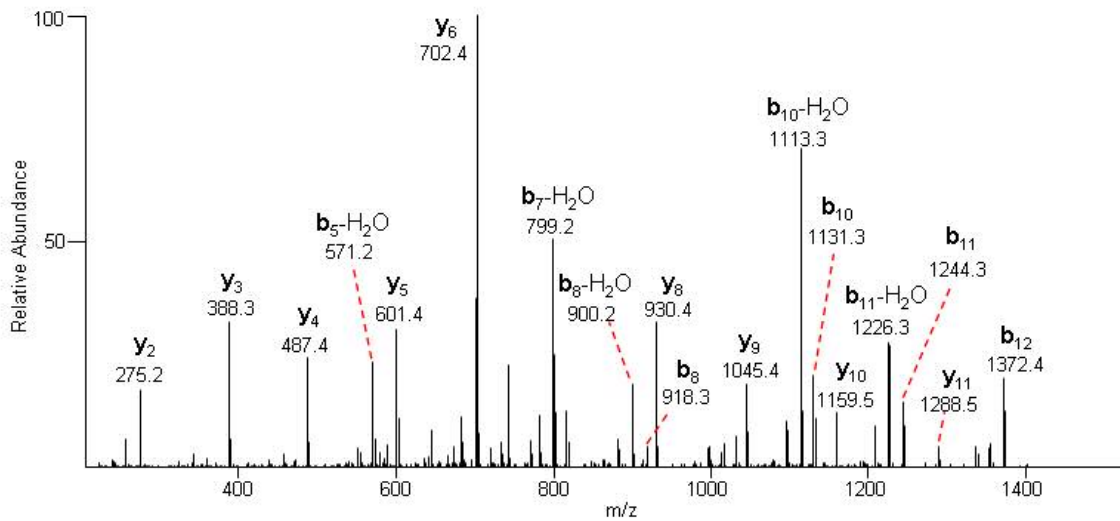

## Supplemental Figure S1 (H)

(i)

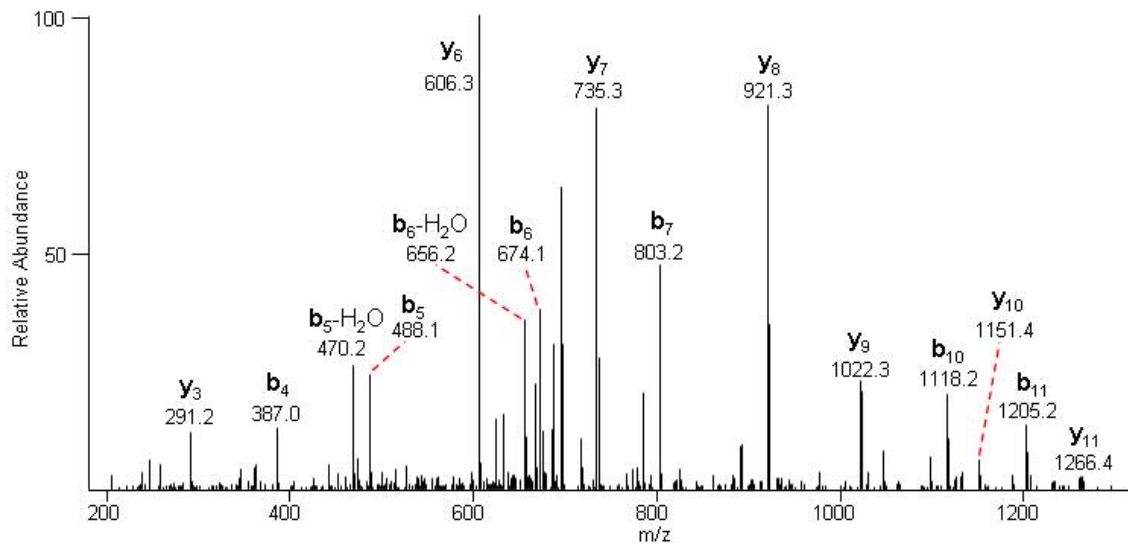

(ii)

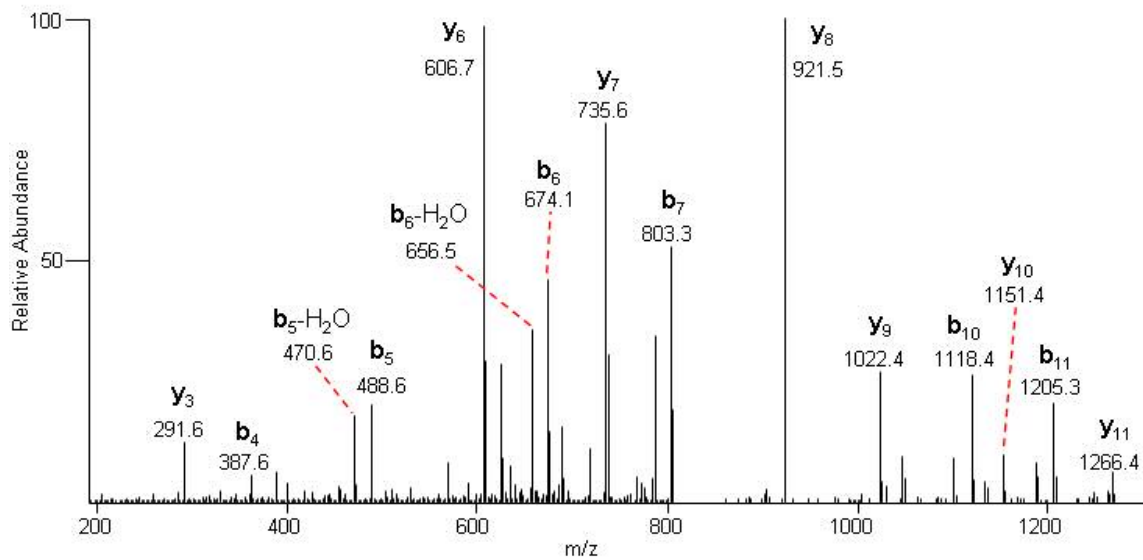

# Supplemental Figure S1 (I)

(i)

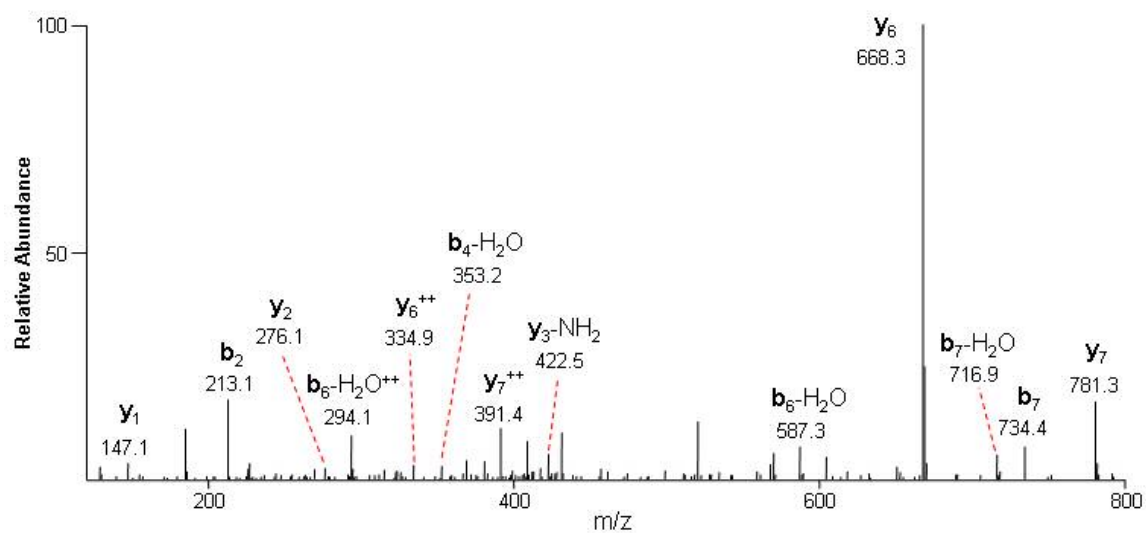

(ii)

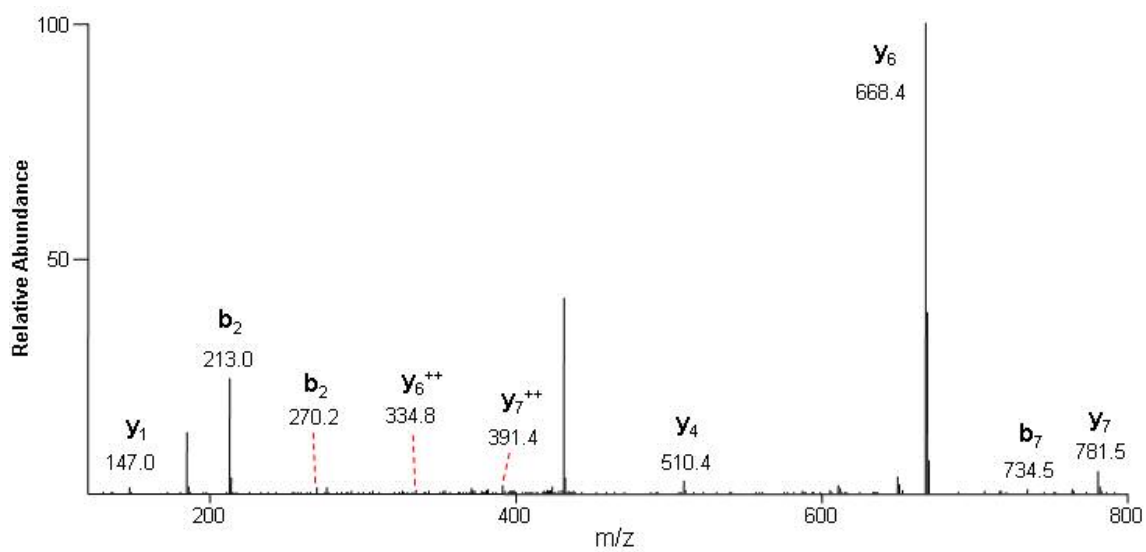

# Supplemental Figure S1 (J)

(i)

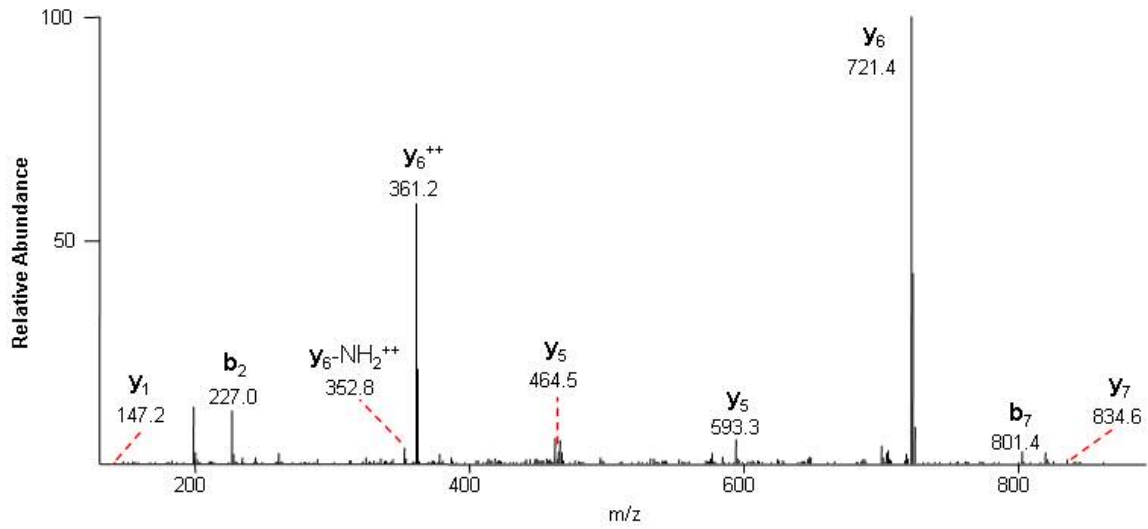

(ii)

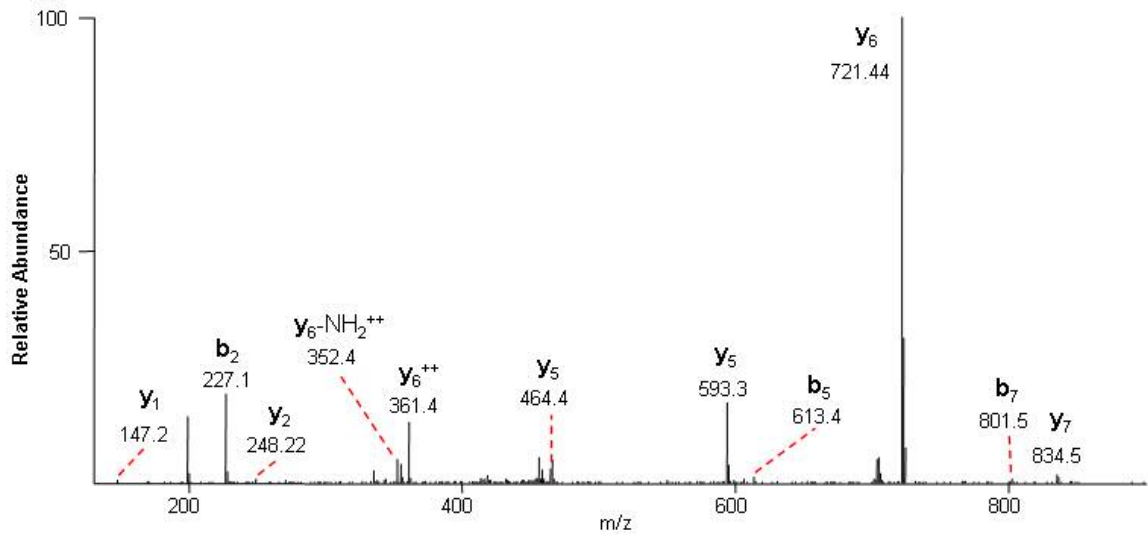

## Supplemental Table T1

| <b>SampleName</b> | <b>Protein#</b> | <b>Peptide#</b> | <b>UniqPeptide#</b> |
|-------------------|-----------------|-----------------|---------------------|
| h01               | 166             | 829             | 366                 |
| h02               | 217             | 1242            | 513                 |
| h03               | 210             | 1547            | 548                 |
| h04               | 230             | 1531            | 584                 |
| h05               | 230             | 1369            | 642                 |
| h06               | 248             | 1922            | 833                 |
| h07               | 284             | 2338            | 966                 |
| h08               | 210             | 1741            | 826                 |
| h09               | 220             | 1724            | 787                 |
| h10               | 200             | 1845            | 773                 |
| h11               | 204             | 2106            | 983                 |
| h12               | 190             | 3605            | 993                 |
| h13               | 237             | 2366            | 1252                |
| h14               | 189             | 1903            | 953                 |
| h15               | 211             | 2420            | 1257                |
| h16               | 231             | 2807            | 1641                |
| h17               | 201             | 2477            | 1538                |
| h18               | 154             | 2396            | 1380                |
| h19               | 170             | 2401            | 1356                |
| h20               | 191             | 1374            | 738                 |
| y01               | 156             | 704             | 327                 |
| y02               | 219             | 1202            | 508                 |
| y03               | 190             | 1340            | 522                 |
| y04               | 172             | 1375            | 501                 |
| y05               | 215             | 1537            | 586                 |
| y06               | 231             | 1956            | 725                 |
| y07               | 224             | 2178            | 834                 |
| y08               | 250             | 2366            | 945                 |
| y09               | 176             | 2301            | 768                 |
| y10               | 237             | 3317            | 1175                |
| y11               | 150             | 2256            | 753                 |
| y12               | 183             | 2590            | 894                 |
| y13               | 172             | 2551            | 995                 |
| y14               | 176             | 2731            | 1071                |
| y15               | 158             | 2502            | 935                 |
| y16               | 174             | 2255            | 976                 |
| y17               | 163             | 2312            | 1164                |
| y18               | 208             | 3196            | 1537                |
| y19               | 152             | 3182            | 1362                |
| y20               | 271             | 2075            | 1134                |
